# Supplementary material for: Predictors of hepatitis B vaccine uptake among healthcare workers in Sokoto, Nigeria, 2023: a cross-sectional analysis
Source: Research Square preprint supplement (doi:10.21203/rs.3.rs-8472501/v1), 2026-01-06
Supplement: Supplementary file 1 [file 992f9db5038321500128a17d.docx]

**DEPARTMENT OF COMMUNITY MEDICINE**

**FACULTY OF CLINICAL SCIENCES**

**COLLEGE OF HEALTH SCIENCE**

**AHMADU BELLO UNIVERSITY ZARIA**

**QUESTIONNAIRE FOR PREDICTORS OF HEPATITIS B VACCINE UPTAKE AMONG HEALTHCARE WORKERS IN SOKOTO, NIGERIA, 2023: A CROSS-SECTIONAL ANALYSIS**

No…………………………………….

**Background**

Hepatitis B virus (HBV) has been a major bloodborne pathogen infecting a large number of healthcare workers (HCWs) all over the world.It is also the leading cause of acute, chronic liver disease, cirrhosis, and hepatocellular carcinoma which leads to death.

Nigerian population born before the introduction of hepatitis B vaccine around 2004 would have missed getting the vaccine, as such, would be vulnerable to the infection and its complications. The oldest of these children that received hepatitis B vaccine should be around 18 years now. Most health care workers are above 18 years as at today. It is important to determine vaccine uptake among the population of health workers to understand the level of risk to which they are exposed. There is a chance that most of the healthcare workers above 18 years of age did not receive the vaccine as infants. Probably a large number are yet to receive the vaccine even as adults.

**Section A: Sociodemographic Characteristics**

1. Age (In years, last birthday) ____________________
2. Sex
   1. Male
   2. Female
3. Relationship Status
   1. Single
   2. Married
   3. Widowed
   4. Separated
   5. In a relationship but not married
4. Tribe
   1. Hausa
   2. Igbo
   3. Yoruba
   4. Fulani
   5. Other
5. Religion
   1. Islam
   2. Christianity
   3. Other

Educational Level

- 1. No formal education
  2. Primary
  3. Secondary
  4. Tertiary (Diploma, HND, ND Etc)
  5. Bachelors
  6. Masters
  7. Doctorate

1. Professional Cadre
   1. Doctor
   2. Dentist
   3. Nurse
   4. Medical Laboratory scientist
   5. Medical Laboratory technician
   6. CHO
   7. CHEW
   8. EHO
   9. Other
2. Department
   1. Medicine
   2. Surgery
   3. Emergency
   4. Obstetrics and gynaecology
   5. Paediatrics
   6. Anaesthesia
   7. Laboratory
   8. Dental and Maxillofacial Surgery
   9. Ophthalmology
   10. Other

If other, which department? ______________

1. Years of Practice
   1. Less than 1 year
   2. More than 1 year

If more than 1 year, enter exact years _________________

1. Major professional duties (choose multiple)
   1. In-patient care
   2. Out-patient care
   3. Minor surgery
   4. Major surgery
   5. Child delivery in maternity
   6. Injection and canulation
   7. Wound care
   8. Blood sample collection and handling
   9. Cleaning floors and beds
   10. Insertion of tubes and catheters
   11. Drainage of body fluids
   12. Dispensing of Drugs
   13. Other

If other, name other duties ____________________

1. Do you have any chronic medical illness?
   1. Hypertension
   2. Diabetes
   3. HIV
   4. Hep C
   5. TB
   6. Asthma
   7. Other

If other, what chronic illness? __________________________

1. Which of these vaccines have you taken as an adult? Select multiple
   1. COVID-19
   2. Hepatitis B
   3. Meningitis
   4. Tetanus
   5. Yellow Fever
   6. Other
   7. None
2. Which of these infections have you been screened for in the last 1 year? Select multiple
   1. COVID-19
   2. Hepatitis B
   3. Hepatitis C2
   4. HIV
   5. None

**Section B: Knowledge of Hepatitis B Virus**

1. Ever heard of hepatitis B?
   1. Yes
   2. No
2. What causes Hepatitis B?
   1. Fungi
   2. Bacteria
   3. Virus
   4. Parasite
   5. Don’t know
3. If yes to hearing about hepatitis B answer true or false on modes of transmission
   1. Body cuts
   2. Blood products
   3. Contact with animals
   4. Droplet infection
   5. Needle pricks
   6. Shaking hands
   7. Sharing dishes
   8. Unprotected sexual intercourse
   9. Kisses and hugs
   10. Vertical transmission (Mother to child)
4. Select a major complication caused by hepatitis B viral infection?
   1. Blindness
   2. Liver Cancer
   3. Brain Cancer
   4. I don’t know
5. Identify the preventive measures for hepatitis B
   1. Condoms
   2. Gloves
   3. Hep B Vaccination
   4. Screening blood before transfusion
   5. I don’t know

**Section C: Perception of hepatitis B**

To what extent do you agree or disagree

1. Hepatitis B is a serious infection
   1. Strongly Agree
   2. Agree
   3. Neutral/I don’t know
   4. Disagree
   5. Strongly disagree
2. I feel that my job increases the risk of me getting the hepatitis B virus.
   1. Strongly Agree
   2. Agree
   3. Neutral/I don’t know
   4. Disagree
   5. Strongly disagree
3. Needle stick injuries expose health workers to deadly blood-borne pathogens like Hep B
   1. Strongly Agree
   2. Agree
   3. Neutral/I don’t know
   4. Disagree
   5. Strongly disagree

**Section D: Occupational Exposure to hepatitis B virus**

1. Have you ever attended to a patient with hepatitis B?
   1. Yes
   2. No
   3. I don’t know
2. Have you ever been pricked by a sharp object during your practice?
   1. Yes
   2. No
3. If yes when?
   1. Less than 1 year
   2. 1 year and above

If less than 1 year (months)_______________

If 1 year and above (years)

1. If yes did u report the incident?
   1. Yes
   2. no
2. What was done for you after you reported the incident? Select multiple
   1. Blood was screened for hep b
   2. Blood was screened for hep C
   3. Blood was screened for HIV
   4. Was given Hep B vaccine
   5. Had PEP for HIV
   6. Nothing was done

**Section E: Determinants of the uptake of Hepatitis B vaccine**

1. Have you been vaccinated against hepatitis B virus?
   1. Yes
   2. No
   3. I don’t know
2. If No, what reasons might have been obstacles to you getting vaccinated?
   1. No need for hep B Vaccine
   2. The vaccine is not readily available
   3. The cost is too high
   4. I hate injections
   5. Time between doses is too prolonged
   6. I have suffered from hepatitis B before
   7. Other

If Other, what? ___________________________

1. If Yes, Vaccinated, number of doses
   1. 1 dose
   2. 2 doses
   3. 3 doses
   4. More than 3 doses
2. If 1 or 2 doses, why incomplete?
   1. Not reached time for the next dose
   2. Forgot to go
   3. Was sick
   4. Felt no need
   5. Experienced an adverse event
   6. Fear of needles
   7. Had hepatitis B
   8. Other

If Other, what? _____________________

1. If Yes, Vaccination. Have you ever had your blood checked to ascertain Hep B immunity after vaccination?
   1. Yes
   2. No
2. If yes vaccination, what was your motivation for getting vaccinated? (Choose multiple)
   1. My fear of contracting Hep B
   2. Vaccine was readily available
   3. My employer’s policy
   4. Other
3. Has your partner been vaccinated against Hep B? (If married, in a relationship)
   1. Yes
   2. No
4. If no, Why not?
   1. I am not at risk
   2. The vaccine is not available
   3. The vaccine is expensive
   4. I declined
   5. Other

**Section F: Needle stick injuries and Vaccine Policy**

1. Is there a documented protocol for reporting needle pricks in your hospital?
   1. Yes
   2. No
   3. I don’t know
2. What is the policy for reporting needle stick injuries in your hospital? (If yes to documented protocol above) Select multiple
   1. No policy
   2. Report the prick
   3. Take blood sample for HIV screening
   4. Take blood sample for Hep B and C screening
   5. Post exposure prophylaxis for HIV
   6. Vaccination for hepatitis B virus with Antibody
3. Did your employers request your hep B vaccination status before the commencement of your job?
   1. Yes
   2. No
4. Was the need for vaccination against HBV mentioned to you by your employer?
   1. Yes
   2. No
5. Were there any advocacy measures in your institution that encouraged vaccination of health care workers against hepatitis B virus
   1. Yes
   2. No
   3. I don’t know
6. If yes, State the advocacy measures for hepatitis B virus
   1. _______________
   2. ________________
   3. _________________
   4. __________________
7. If yes, how would you rate their effectiveness?
   1. Very Effective
   2. Effective
   3. Partially Effective
   4. Not Effective
8. Has your institution organised, recommend or sponsor any workshop to educate staff on dangers of hepatitis B virus in the last 1 year?
   1. Yes
   2. No
9. Has your institution organised, recommend or sponsor any workshop to educate staff on infection prevention and control for blood borne pathogens in the last 1 year?
   1. Yes
   2. No

**Section G: Attitude**

1. Please tick the number that best describes your attitudes and opinions towards the Hepatitis B virus Vaccination. The numbers represent the following responses: (1 = Strongly Agree, 2= Agree, 3= I am not sure/Neutral, 4= Disagree, 5=Strongly disagree)
   1. I often attend workshops on hepatitis B +
   2. Healthcare workers should be screened for Hep B before they start working +
   3. A vaccine for hepatitis B does not exist -
   4. Vaccine is meant for children under 5 alone -
   5. The vaccine is not safe -
   6. It is crucial for all healthcare workers to get protection from hepatitis B +
   7. I would refer other healthcare workers for hepatitis B Vaccination +
   8. Hepatitis B vaccination shouldn’t be made a policy in the healthcare system -
2. Any other remarks/recommendations that you would wish to make concerning vaccination of Health Care Workers against Hepatitis B Virus

_______________________________________________

End of Questionnaire
