# Supplementary material for: Predictors of hepatitis B vaccine uptake among healthcare workers in Sokoto, Nigeria, 2023: a cross-sectional analysis
Source: Research Square preprint supplement (doi:10.21203/rs.3.rs-8472501/v1), 2026-01-06
Supplement: Supplementary file 2 [file fd550019997b50937f7e6ef3.docx]

**List of Health Facilities in Sokoto Metropolis**

| **SN** | **Health Facility** | **Type** | **Tier** | **Selection** |
| --- | --- | --- | --- | --- |
| 1 | Police Hospital | Government | Secondary |  |
| 2 | Saraki Specialist Hospital | Private | Secondary |  |
| 3 | Free Hand Specialist Hospital | Private | Secondary |  |
| 4 | Mabera PHC | Government | Primary | Yes |
| 5 | Gidan Dahala | Government | Primary | Yes |
| 6 | Reliance Specialist Hospital | Private | Secondary | Yes |
| 7 | Medstop Clinical Diagnosis | Private | Secondary | Yes |
| 8 | Al Umma Hospital | Private | Secondary |  |
| 9 | Kwannawa Primary Health Clinic | Government | Primary |  |
| 10 | Dambuwa Primary Health Clinic | Government | Primary |  |
| 11 | Alfijir Specialist Hospital | Private | Secondary |  |
| 12 | Hamdala Medical Clinic | Private | Primary |  |
| 13 | Karaye Hospital | Private | Secondary |  |
| 14 | Yar Akija Primary Health Clinic | Government | Primary | Yes |
| 15 | Turaki Primary Health Clinic | Government | Primary |  |
| 16 | Zefafi Women Specialist Hospital | Government | Primary |  |
| 17 | Minanata PHC | Government | Primary |  |
| 18 | Planned Parenthood Federation of Nigeria | Private | Primary |  |
| 19 | Sheikh Gummi Clinic | Government | Primary |  |
| 20 | Husaini Medical Clinic | Private | Secondary |  |
| 21 | Kwanni Health Clinic | Government | Primary |  |
| 22 | Aliyu Jodi Primary Health Clinic | Government | Primary |  |
| 23 | Kainuwa Clinic | Private | Primary |  |
| 24 | Citi Premier Hospital | Private | Primary |  |
| 25 | Born And Joint | Private | Primary |  |
| 26 | Ubandoma Specialist | Private | Primary |  |
| 27 | Sarari Clinic | Private | Primary |  |
| 28 | Holy Family Clinic | Private | Primary |  |
| 29 | Sokoto Clinic | Private | Primary | Yes |
| 30 | Asada PHC | Government | Primary |  |
| 31 | Helele PHC | Government | Primary |  |
| 32 | Rumbukawa PHC | Government | Primary | Yes |
| 33 | Ruggar Liman Health Post | Government | Primary |  |
| 34 | More Health Post | Government | Primary |  |
| 35 | Kofar Rini PHC | Government | Primary | Yes |
| 36 | Alkamawa Health Clinic | Government | Primary |  |
| 37 | Arkilla PHC | Government | Primary | Yes |
| 38 | Kontogora PHC | Government | Primary |  |
| 39 | Gwiwa PHC | Government | Primary |  |
| 40 | Gwiwa Clinic | Government | Primary |  |
| 41 | Jarma Uk Health Center | Government | Primary |  |

**List of Health Facilities in Sokoto City – Continued**

| **SN** | **Health Facility** | **Type** | **Tier** | **Selection** |
| --- | --- | --- | --- | --- |
| 42 | Maryam Abacha Hospital | Government | Secondary | Yes |
| 43 | Specialist Hospital Sokoto | Government | Tertiary | Yes |
| 44 | Tudun Wada Health Clinic | Government | Primary |  |
| 45 | Hafsat Ahmad Bello Primary Health Clinic | Government | Primary |  |
| 46 | Caliphate Multi Specialist Hospital | Private | Secondary |  |
| 47 | Korino Clinic | Private | Primary |  |
| 48 | Gagi Phc | Government | Primary | Yes |
| 49 | Gidan Masau Dispensary | Government | Primary |  |
| 50 | Mana Babba PHC | Government | Primary |  |
| 52 | Mana Tudu PHC | Government | Primary |  |
| 53 | Wcwc | Government | Secondary | Yes |
| 54 | Kofar Kade PHC | Government | Primary | Yes |
| 55 | Market Clinic | Government | Primary |  |
| 56 | Sweetmother Hospital | Private | Primary |  |
| 57 | Lafiya Specialist Hospital | Private | Primary |  |
| 58 | Mabera Mujaya Hp | Government | Primary |  |
| 59 | Alheri | Private | Primary |  |
| 60 | Sarda Clinic | Government | Primary |  |
| 61 | Farufaru Phc | Government | Primary |  |
| 62 | Bado Clinic | Government | Primary |  |
| 63 | Usmanu Danfodiyo University Teaching Hospital | Government | Tertiary | Yes |
| 64 | Shehu Shagari College of Education Clinic | Government | Primary |  |
| 65 | Alhufa | Government | Primary |  |
| 66 | Sahel Specialist Hospital | Private | Secondary |  |
| 67 | Market Clinic | Government | Primary |  |
| 68 | Runjin Sambo PHC | Government | Primary | Yes |
| 69 | Tudun Faila PHC | Government | Primary |  |
| 70 | Gidan Dare PHC | Government | Primary |  |
| 71 | Noma Hospital | Government | Secondary | Yes |
| 72 | Kwadanwa | Government | Primary |  |
| 73 | Prison Clinic | Government | Primary |  |
| 74 | Sultan Palace Clinic | Government | Primary |  |
| 75 | Wanzamai Health Clinic | Government | Primary |  |
| 76 | Bazza Primary Health Care | Government | Primary |  |
| 77 | Rinin Tawaye Health Clinic | Government | Primary |  |
| 78 | Sabon Gari Dole | Government | Primary |  |
| 79 | Bakin Kusu | Government | Primary |  |
| 80 | Kalambaina | Private | Primary |  |
| 81 | Police Clinic | Government | Primary |  |
| 82 | Jama'A A Clinic | Private | Secondary |  |
| 83 | Arkilla Federal Low-Cost Clinic | Government | Primary |  |
| 84 | Dallatu Primary Health Clinic | Government | Primary |  |
| 85 | Green Tauraro Clinic | Private | Primary |  |
| 86 | Standard Clinic | Private | Primary |  |
